1 **Dining in the daylight: Nocturnal rhinoceros beetles extend feeding periods on host**  
2 **trees with reduced sap exudation**

3

4 **Asahi Kanda<sup>1</sup>, Ryo Shibata<sup>2</sup>, Takahiro Ueno<sup>1</sup>, Namifu Yamashita<sup>1</sup>, Wataru Kojima<sup>1</sup>**

5 <sup>1</sup>Graduate School of Sciences and Technology for Innovation, Yamaguchi University,

6 1677-1 Yoshida, Yamaguchi 7538511, Japan

7 <sup>2</sup>Miyashiro-Town Maehara Junior High School, 461 Naka Miyashiro Town,

8 Minamisaitama, Saitama 3450815, Japan

9

10 **Correspondence:** Asahi Kanda, Graduate School of Sciences and Technology for

11 Innovation, Yamaguchi University, 1677-1 Yoshida, Yamaguchi City, Yamaguchi

12 7538511, Japan.

13 Email: [asahikanda083@gmail.com](mailto:asahikanda083@gmail.com)

14 Telephone: +81-83-933-5767

15

16 This MS consists of 14 pages, 2721 words and 4 figures.

17

18 **Abstract**

19 While the Japanese rhinoceros beetle *Trypoxylus dichotomus* typically feeds on the sap  
20 of the oak *Quercus acutissima* and the crape myrtle *Lagerstroemia subcostata* during the  
21 night, it exhibits feeding activity both during the day and night when it utilizes the ash  
22 tree *Fraxinus griffithii*. However, the mechanisms underlying the variations in temporal  
23 activity patterns remain unknown. We compared feeding rates (measured as body mass  
24 increments) and sap exudation rates among *F. griffithii*, *Q. acutissima*, and *L. subcostata*.  
25 We found that beetles feeding on *L. subcostata* and *Q. acutissima* exhibited significantly  
26 higher feeding rates than those feeding on *F. griffithii*. No significant differences in  
27 feeding rates were observed between *L. subcostata* and *Q. acutissima*. The sap exudation  
28 rate was significantly higher for *Q. acutissima* than for *F. griffithii*. However, there were  
29 no significant differences in the sap exudation rates between *F. griffithii* and *L. subcostata*  
30 or between *Q. acutissima* and *L. subcostata*. These findings suggest that lower feeding  
31 rates on *F. griffithii* prolong the feeding duration, resulting in daytime activity. While the  
32 low sap exudation in *L. subcostata* seems inconsistent with high feeding rates on this host,  
33 this apparent contradiction could be related to the extended duration of sap exudation.

34

35 **Keywords;** Circadian activity, Coleoptera, Daily activity pattern, Foraging behavior,  
36 Plasticity, Sap-feeding insect, Scarab beetle, Scarabaeidae

37

## 38 **Introduction**

39 The daily activity patterns of animals have evolved through natural selection to maximize  
40 their fitness. Although activity patterns are typically fixed within species and are  
41 classified as diurnal, nocturnal, or crepuscular, some species exhibit adaptive changes in  
42 their activity patterns in response to various factors, including developmental stage  
43 (Paulissen 1988), predation pressure (Shiojiri et al. 2006), season (Stiles et al. 2017),  
44 temperature (Nishimura et al. 2005) and physiological state. Hunger is a primary  
45 physiological factor influencing animal activity patterns (Lockard 1978; Kramer et al.  
46 2001; Pereira 2010). Starvation compels individuals to engage in foraging activities to  
47 secure the necessary energy, causing them to deviate from their original temporal niches,  
48 even if such behavior incurs some costs.

49

50 The Japanese rhinoceros beetle *Trypoxylus dichotomus* (Coleoptera, Scarabaeidae,  
51 Dynastinae) feeds on tree sap exudates. In Japan, beetles utilize various host tree species  
52 across different taxonomic groups, such as Fagaceae, Ulmaceae, and Oleaceae (Siva-  
53 Jothy 1987; Hongo 2006; Moriue 2009; Yagihashi et al. 2014; Del sol et al. 2021).  
54 Although the rhinoceros beetle is typically nocturnal, its activity patterns vary plastically  
55 depending on the host species. Temporal activity patterns were quantitatively investigated  
56 in two host species: the oak *Quercus acutissima* and the ash tree *Fraxinus griffithii*. In *Q.*  
57 *acutissima*, *T. dichotomus* feeds on sap from wounds formed by wood-boring insects,  
58 such as the carpenter worm *Cossus jezoensis*, the bark beetle *Platypus quercivorus*, and  
59 the white stripe long-horned beetle *Batocera lineolate*. *T. dichotomus* flies to sap sites on  
60 *Q. acutissima* after sunset and leaves its roosts before sunrise; therefore, beetles are rarely  
61 seen during the daytime (Siva-Jothy 1987). In contrast, *T. dichotomus* carves the bark of

62 *F. griffithii*, using its mandible to feed on the sap with head-scooping movements (Hongo  
63 2006; Ichiishi et al. 2019). *T. dichotomus* individuals fly to *F. griffithii* trees at night and  
64 remain at their feeding sites for extended periods compared to their feeding behavior on  
65 *Q. acutissima*. Consequently, more than half of them continue to feed during the day  
66 (Shibata and Kojima 2021). Despite the distinct contrast in activity patterns among host  
67 species, the underlying mechanisms remain unclear.

68

69 Since wounds on *F. griffithii* formed by *T. dichotomus* exuded less sap than those on *Q.*  
70 *acutissima* (R. Shibata, personal observation), we predicted that lower feeding rates on *F.*  
71 *griffithii* would prolong feeding duration, resulting in daytime activity. To confirm this  
72 prediction, we compared the temporal activity patterns, sap exudation rates, and feeding  
73 rates of beetles among the host species. In addition to *F. griffithii* and *Q. acutissima*, we  
74 dealt with the crape myrtle *Lagerstroemia subcostata*, which is taxonomically distinct  
75 from the other two hosts.

76

## 77 **Materials and Methods**

### 78 *Activity Patterns on Lagerstroemia subcostata*

79 Although the activity patterns of *T. dichotomus* have been previously reported for two  
80 host species, *Q. acutissima* and *F. griffithii* (see Introduction), no such information is  
81 available for *L. subcostata*. Therefore, we assessed the activity patterns of beetles feeding  
82 on *L. subcostata*. The study was conducted from August 6 to August 10, 2021, along a  
83 path (total length of approximately 300 m) in Anbo, Yakushima-cho, Kagoshima  
84 Prefecture, Japan. Twenty-five trees were selected for observation based on preliminary  
85 surveys, and the number of beetles on these trees was counted hourly. Surveys were not

86 conducted during rainy weather, and there were 83 counting events over the course of the  
87 study. If the beetles were high up in the trees, they were observed using binoculars (Atrek  
88 II HR 8 × 32 WP; Vixen). For night-time observations, a headlight (MM285-h; GENTOS)  
89 was used; however, direct illumination of the beetles was avoided.

90

#### 91 *Feeding Rate*

92 The weight gain of beetles per hour was measured as an indicator of feeding rate. The  
93 experiments were conducted in Sugito Town, Saitama Prefecture, in 2021 for *F. griffithii*  
94 (n = 20 beetles); Yamaguchi City, Yamaguchi Prefecture, in 2021 for *Q. acutissima* (n =  
95 26 beetles); and Yakushima-cho in 2022 for *L. subcostata* (n = 36 beetles). Prior to the  
96 experiments, field-collected beetles were fasted for 3 days to stimulate their feeding  
97 behavior. Beetles were weighed using a portable digital scale (SF-700; TUO) at an  
98 accuracy of 0.01 g. They were then immediately released into the trees. They typically  
99 initiated sap feeding within approximately 10 min. After an hour of feeding, beetles were  
100 collected and weighed. Individuals who did not continuously feed were excluded from  
101 the analysis. Although beetles sometimes defecate during feeding, the effects of  
102 defecation were not considered in this analysis.

103

#### 104 *Sap Exudation Rate*

105 The sap exudation rate at the beetle feeding sites was measured following the method  
106 described by Yoshimoto (2008). The experiments were conducted in Mitaka City, Tokyo,  
107 in 2023 for *F. griffithii* (n = 5 trees and 20 wounds); Atsugi City, Kanagawa Prefecture,  
108 in 2023 for *Q. acutissima* (n = 5 trees and 10 wounds); and Yakushima-cho in 2023 for *L.*  
109 *subcostata* (n = 2 trees and 8 wounds). The beetles were removed from the feeding sites,

110 and solids and liquids were wiped away with a paper towel. An unused paper towel  
111 (approximately 1.5 g), the weight of which was measured beforehand, was pressed against  
112 the wounds to absorb the sap. The paper towel was covered with plastic wrap to prevent  
113 evaporation. After 20 min, the towel was collected and weighed again. The increase in  
114 weight was used as an indicator of the sap exudation rate.

115

### 116 *Statistical Analyses*

117 Tukey's multiple comparison method (HSD) was used to determine variation in feeding  
118 rates among the three host species. As our preliminary analyses showed that pronotum  
119 width (an indicator of body size) and sex did not significantly affect the feeding rate, these  
120 variables were not included in the model. Comparisons of sap exudation rates among host  
121 species were conducted using TukeyHSD. The R software package (version 4.0.4; R  
122 Foundation for Statistical Computing, Vienna, Austria) was used for statistical analysis.

123

### 124 **Results**

125 The number of *T. dichotomus* on *L. subcostata* started increasing around 8 pm, reaching  
126 a maximum at midnight, and most individuals left the tree by 5 am. The number of beetles  
127 during the daytime was approximately one-fifth of the night-time peak. Most of the  
128 individuals on the trees were engaged in activities such as feeding and mating. These  
129 results indicated that the beetles feeding on *L. subcostata* were nocturnal.

130

131 The weight gain of the beetles feeding on *L. subcostata* and *Q. acutissima* was  
132 significantly greater than those feeding on *F. griffithii*. There was no significant difference  
133 in the weight gain between those feeding on *Q. acutissima* and *L. subcostata*. The body

134 weights of some individuals decreased after 1-hour feeding, probably because of  
135 defecation.

136

137 The sap exudation rate of *Q. acutissima* was significantly higher than that of *F. griffithii*.

138 There were no significant differences in the sap exudation rates between *F. griffithii* and

139 *L. subcostata* or *Q. acutissima* and *L. subcostata*.

140

## 141 **Discussion**

142 This study revealed that the feeding rate of *T. dichotomus* on *F. griffithii* was lower than

143 that on other host species. In addition, the sap exudation rate of *F. griffithii* was lower

144 than that of *Q. acutissima*. Furthermore, we found that the beetle activity patterns on *L.*

145 *subcostata* were similar to those on *Q. acutissima*. Based on these findings, when beetles

146 utilize host trees with low sap exudation, their activity periods are likely to be extended.

147 Feeding behavior on *Q. acutissima* and *L. subcostata* is probably completed during the

148 night, whereas beetles feeding on *F. griffithii* face the challenge of inadequate sap intake

149 at night, compelling them to continue feeding until daytime.

150

151 Sap quantity in *Q. acutissima* was greater than that of the other tree species. This may be

152 due to the sap exudation mechanism of *Q. acutissima* was different from that of the other

153 tree species. In *Q. acutissima*, the interior of the trunk was damaged by wood-boring

154 insects, whereas in the other two tree species, only the surface of the bark was carved by

155 *T. dichotomus*. There was no significant difference in sap exudation rates between *F.*

156 *griffithii* and *L. subcostata*. Nevertheless, the feeding rates were significantly higher in *L.*

157 *subcostata*. These results are seemingly contradictory but could be explained by the

158 difference in the duration of sap exudation. *L. subcostata* may continue to produce sap  
159 longer with a single excavation than *F. griffithii*.

160

161 Diurnal activities are likely to impose costs on *T. dichotomus*. The large black body of *T.*  
162 *dichotomus* makes it more conspicuous during the day, increasing its vulnerability to  
163 visual predators such as crows (Kojima et al. 2014). Furthermore, the daytime ambient  
164 temperature in central Japan reaches 35–40 °C, which may cause physiological stress to  
165 *T. dichotomus*, as has been reported in other insect species (Chen et al. 2018). Despite  
166 these potential costs, *T. dichotomus* might gain net benefits from the extended activity  
167 period of *F. griffithii*.

168

169 Although this study suggests that feeding rate affects the activity patterns of rhinoceros  
170 beetles, multiple unexplored factors could also be attributable to host-dependent activity  
171 patterns. For example, insufficient nutritional content (e.g., sugar and protein) in the sap  
172 may lead to prolonged feeding times. Interspecific competition for sap sites is also one of  
173 the potential factors. Kojima (2023) reported that the giant hornet *Vespa mandarinia*  
174 visited sap sites on *Q. acutissima* at approximately 5:00 am and physically excluded *T.*  
175 *dichotomus*. After the hornets were experimentally removed, the beetles continued to  
176 occupy the sap sites until noon. Thus, the activity duration of rhinoceros beetles may be  
177 extended into the daytime even on *Q. acutissima*, if they cannot obtain adequate sap due  
178 to factors such as lower conditions of sap sites or intense intraspecific competition.  
179 Additionally, male beetles are active at different times of the day depending on their body  
180 size (Siva-Jothy 1987). As the body size of individuals at the sap sites was not measured  
181 in this or previous studies (Shibata and Kojima 2021; Kojima 2023), further investigation



182 of individual-level activity patterns is required.

183

184 Although *F. griffithii* seems to be an inferior host for *T. dichotomus*, many individuals (>  
185 100) of *T. dichotomus* sometimes aggregate on *F. griffithii* in central Japan (Shibata and  
186 Kojima 2021). This counterintuitive phenomenon could be caused by a lack of better  
187 hosts (e.g., *Q. acutissima*) in their habitat. Alternatively, given that *F. griffithii* is not  
188 native to central Japan, it might act as an “evolutionary trap” (Schlaepfer et al. 2005) by  
189 releasing certain chemicals that strongly attract *T. dichotomus*. Further studies are  
190 required to elucidate the mechanisms underlying the aggregation of beetles in this host  
191 species.

192

### 193 **Acknowledgements**

194 We thank Kazuya Shibata and Mariko Shibata for assistance with field observation, and  
195 Yoshiaki Kobayashi for the permission to perform fieldwork and provision of information.

196

### 197 **Funding**

198 This study was partly supported by grants from Yamaguchi University.

199

### 200 **Declarations**

### 201 **Conflict of interest**

202 The authors declare that they have no conflict of interest.

### 203 **Ethical approval**

204 No approval of research ethics committees was required for this research.

205

206 **References**

- 207 Chen H, Zheng X, Luo M, Guo J, Solangi G, Wan F, Zhou Z (2018) Effect of short-term  
208 high-temperature exposure on the life history parameters of *Ophraella communa*. Sci Rep  
209 8:13969
- 210 Del Sol JF, Hongo Y, Boisseau RP, Berman GH, Allen CE, Emlen DJ (2021) Population  
211 differences in the strength of sexual selection match relative weapon size in the Japanese  
212 rhinoceros beetle, *Trypoxylus dichotomus* (Coleoptera: Scarabaeidae). Evolution 75:394–  
213 413
- 214 Hongo Y (2006) Bark-carving behavior of the Japanese horned beetle *Trypoxylus*  
215 *dichotomus septentrionalis* (Coleoptera: Scarabaeidae). J Ethol 24:201–204
- 216 Kojima W (2023) Temporal niche shifts driven by interference competition: Giant hornets  
217 exclude rhinoceros beetles at sap sites at dawn. Ecology 104:e3914
- 218 Kramer K, Birney E (2001) Effect of light intensity on activity patterns of Patagonian  
219 leaf-eared mice, *Phyllotis xanthopygus*. J Mammal 82:535–544
- 220 Levy O, Dayan T, Porter WP, Kronfeld-Schor N (2019) Time and ecological resilience:  
221 can diurnal animals compensate for climate change by shifting to nocturnal activity? Ecol  
222 Monogr 89:e01334
- 223 Lockard RB (1978) Seasonal change in the activity pattern of *Dipodomys spectabilis*. J  
224 Mammal 59:563–568
- 225 Moriue N (2009) The handbook of the insects which sap attracts (in Japanese). Bunichi-  
226 Sogo Syuppan, Tokyo
- 227 Nishimura T, Numata H, Yoshioka E (2005) Effect of temperature on circadian rhythm  
228 controlling the crepuscular activity of the burying beetle *Nicrophorus quadripunctatus*  
229 Kraatz (Coleoptera: Silphidae). Entomol Sci 8:331–338
- 230 Paulissen MA (1988) Ontogenetic and seasonal comparisons of daily activity patterns of  
231 the six-lined racerunner, *Cnemidophorus sexlineatus* (Sauria: Teiidae). Am Midl Nat  
232 120:355–361
- 233 Pereira JA (2010) Activity pattern of Geoffroy's cats (*Leopardus geoffroyi*) during a

- 234 period of food shortage. *J Arid Environ* 74:1106–1109
- 235 Schlaepfer MA, Sherman PW, Blossey B, Runge MC (2005) Introduced species as  
236 evolutionary traps. *Ecol Lett* 8:241–246
- 237 Stiles RM, Halliday TR, Engbrecht NJ, Swan JW, Lannoo MJ (2017) Wildlife cameras  
238 reveal high resolution activity patterns in threatened crawfish frogs (*Lithobates*  
239 *areolatus*). *Herpetol Conserv Biol* 12:160–170
- 240 Shibata R, Kojima W (2021) An introduced host plant alters circadian activity patterns of  
241 a rhinoceros beetle. *Ecology* 102:e03366
- 242 Shiojiri K, Ozawa R, Takabayashi J (2006) Plant volatiles, rather than light, determine  
243 the nocturnal behavior of a caterpillar. *PLoS Biol* 4:e164
- 244 Siva-Jothy MT (1987) Mate securing tactics and the cost of fighting in the Japanese  
245 Horned Beetle. *J Ethol* 5:165–172
- 246 Yagihashi T, Saitoh T, Maehara N, Noguchi M (2014) Bark-carving and sap-obtaining  
247 behavior of *Trypoxylus dichotomus septentrionalis* on *Fraxinus japonica* (in Japanese).  
248 *Tohoku Soc Forest Sci* 19:63–65
- 249 Yoshimoto J, Nishida T (2007) Boring effect of carpenterworms (Lepidoptera: Cossidae)  
250 on sap exudation of the oak, *Quercus acutissima*. *Appl Entomol Zool* 42:403–410
- 251 Yoshimoto J (2008). Ecological studies on the insect community attracted to sap (in  
252 Japanese). PhD thesis, Kyoto University.  
253

254 **Figures**

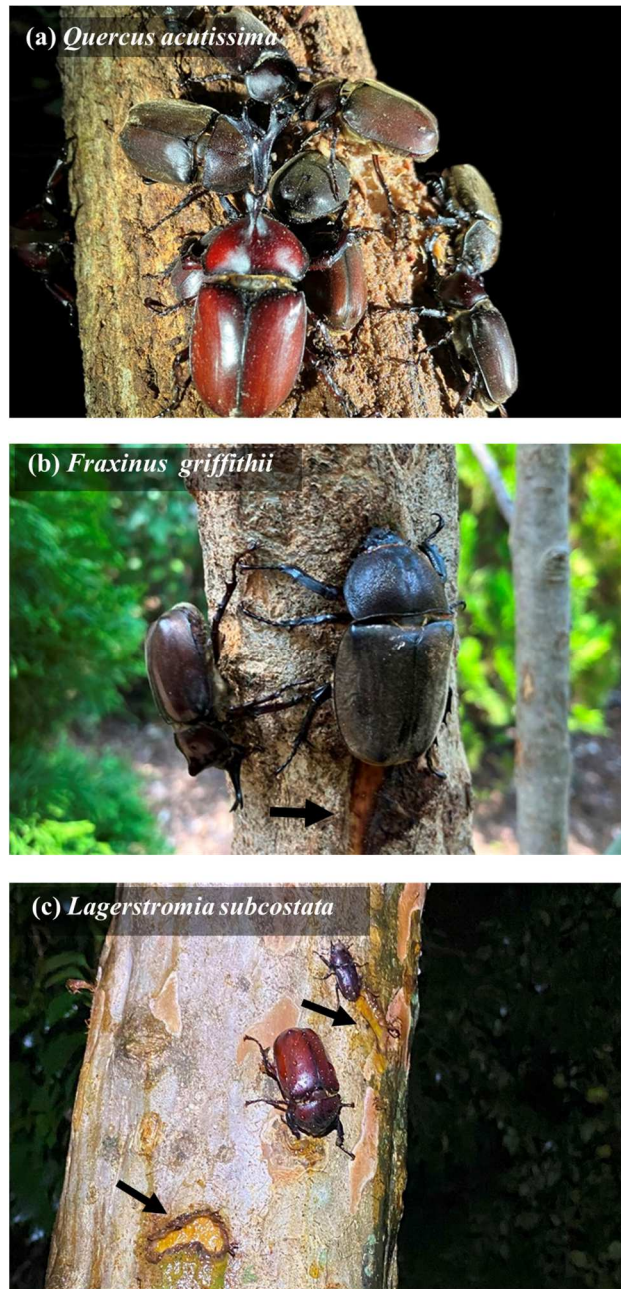

255 Figure 1. *Trypoxylus dichotomus* feeding on the sap of *Quercus acutissima* (a), *Fraxinus*  
256 *griffithii* (b), and *Lagerstroemia subcostata* (c). In (b) and (c), *T. dichotomus* is engaging  
257 in bark carving, with the scars indicated by black arrows. In (c), the smaller beetle  
258 above the female *T. dichotomus* is a female stag beetle *Prosopocoilus inclinatus*.

259

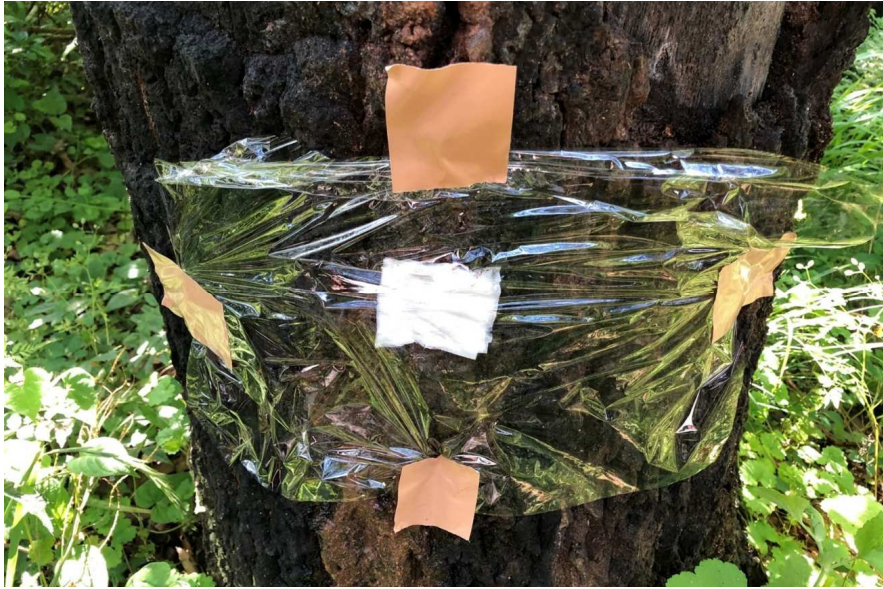

260 Figure 2. Experimental setup for measuring sap exuding rate on *Quercus acutissima*.

261 The sap is absorbed by the paper towel at the center, and covered with plastic wrap.

262 Tape was applied to secure the plastic wrap.

263

264

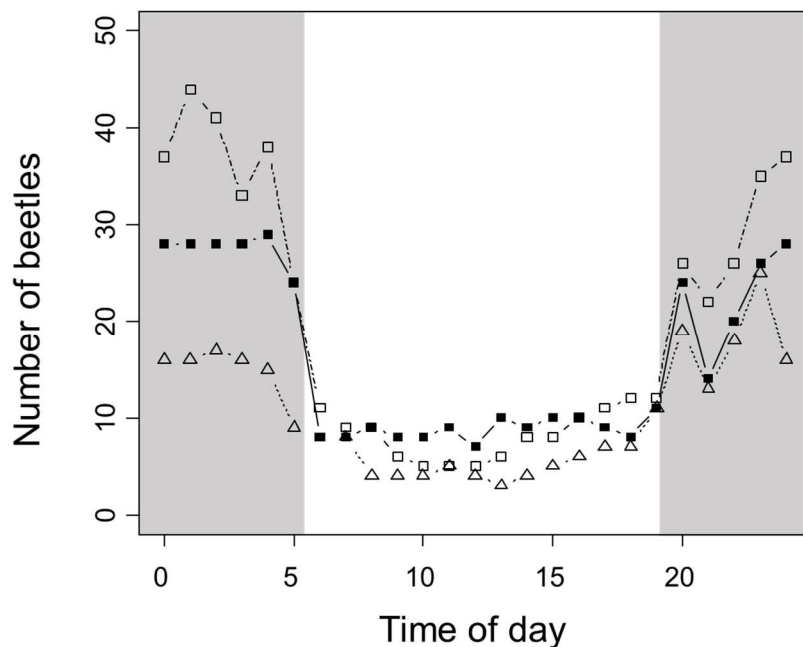

265 Figure 3. Daily activity pattern of *Trypoxylus dichotomus* on *Lagerstroemia subcostata*.

266 Different symbols represent the data of three days. The gray area indicates the night.

267



(a)

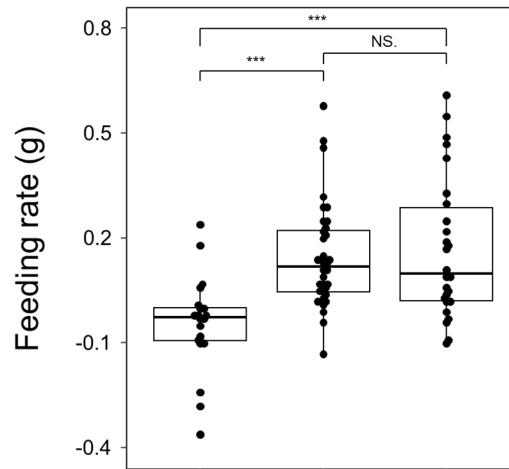

(b)

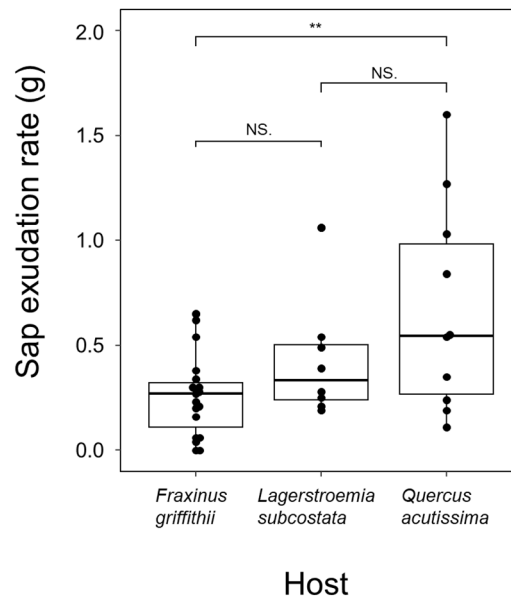

268 Figure 4. Feeding rates of *Trypoxylus dichotomus* (a) and sap exudation rates (b) on  
269 three host species. Feeding rates were assessed using hourly weight gain of the beetle.  
270 Sap exudation rates were assessed by measuring the weight gain during the 20-minute  
271 period that the paper towel was pressed against sap sites. Three asterisks indicate  $P <$   
272 0.001, two asterisks indicate  $P < 0.01$ , and 'N.S.' indicates no significant difference.
